# Supplementary material for: Multiple Variant Calling Pipelines in Wheat Whole Exome Sequencing
Source: MDPI journal article supplement (doi:10.3390/ijms221910400), 2021-09-27
Supplement: s1 [file s1]

**Table S2.** Total number of SNP positions called from the 48 wheat WES data by the 24 pipelines.

|                     | RAW       |         |           | FILTERED |         |           | PERCENTAGE<br>OF CHANGE |         |           |
|---------------------|-----------|---------|-----------|----------|---------|-----------|-------------------------|---------|-----------|
|                     | BCFtools  | VarScan | FreeBayes | BCFtools | VarScan | FreeBayes | BCFtools                | VarScan | FreeBayes |
| <b>BOWTIE2</b>      | 445,100   | 156,015 | 135,585   | 46,820   | 110,825 | 12,083    | 0.89                    | 0.29    | 0.91      |
| <b>BOWTIE2LOCAL</b> | 587,062   | 178,703 | 121,019   | 68,952   | 126,846 | 15,222    | 0.88                    | 0.29    | 0.87      |
| <b>BWA</b>          | 1,078,528 | 112,222 | 431,928   | 94,653   | 81,880  | 53,624    | 0.91                    | 0.27    | 0.88      |
| <b>BWAMEM</b>       | 1,914,760 | 165,928 | 770,611   | 157,388  | 120,497 | 114,518   | 0.92                    | 0.27    | 0.85      |
| <b>GSNAP</b>        | 3,662,264 | 129,402 | 1,291,604 | 177,731  | 95,290  | 194,601   | 0.95                    | 0.26    | 0.85      |
| <b>HISAT2</b>       | 1,262,786 | 52,101  | 644,313   | 55,256   | 38,675  | 100,135   | 0.96                    | 0.26    | 0.84      |
| <b>NOVOALIGN</b>    | 1,914,005 | 121,513 | 819,156   | 135,406  | 85,319  | 118,316   | 0.93                    | 0.30    | 0.86      |
| <b>STAR</b>         | 455,970   | 147,185 | 934,211   | 82,368   | 106,774 | 142,930   | 0.82                    | 0.27    | 0.85      |
