# Supplementary material for: Multiple Variant Calling Pipelines in Wheat Whole Exome Sequencing
Source: MDPI journal article supplement (doi:10.3390/ijms221910400), 2021-09-27
Supplement: s1 [file s1]

**Table S3.** Accuracy metrics of the performance of variant calling pipelines at the sample and population level. Optimum pipelines providing above the average scores were colored red. The maximum and minimum values for each accuracy metrics were bolded. TP: True Positive, PRE: precision, SN: sensitivity, F1: F1 score.

|                         | per Sample |              |              |              | Population     |              |              |              |
|-------------------------|------------|--------------|--------------|--------------|----------------|--------------|--------------|--------------|
|                         | TP         | PRE          | SN           | F1           | TP             | PRE          | SN           | F1           |
| Bowtie2_BCFtools        | 91,324     | 0.689        | 0.019        | 0.036        | 480,701        | 0.579        | 0.091        | 0.157        |
| Bowtie2_FreeBayes       | 25,580     | <b>0.729</b> | 0.005        | <b>0.011</b> | 128,948        | <b>0.611</b> | 0.026        | 0.050        |
| Bowtie2_VarScan         | 92,902     | 0.481        | 0.019        | 0.036        | 512,540        | 0.313        | 0.096        | 0.147        |
| Bowtie2-local_BCFtools  | 98,712     | 0.633        | 0.020        | 0.039        | 533,233        | 0.505        | 0.100        | 0.167        |
| Bowtie2-local_FreeBayes | 17,524     | 0.625        | <b>0.004</b> | 0.007        | <b>93,499</b>  | 0.517        | <b>0.019</b> | <b>0.037</b> |
| Bowtie2-local_VarScan   | 97,988     | 0.469        | 0.020        | 0.038        | 532,996        | 0.333        | 0.100        | 0.154        |
| BWA_BCFtools            | 103,502    | 0.555        | 0.021        | 0.041        | 543,147        | 0.428        | 0.101        | 0.164        |
| BWA_FreeBayes           | 65,959     | 0.597        | 0.014        | 0.026        | 355,538        | 0.401        | 0.069        | 0.118        |
| BWA_VarScan             | 88,453     | 0.547        | 0.018        | 0.035        | 480,080        | 0.414        | 0.091        | 0.149        |
| BWA-mem_BCFtools        | 118,265    | 0.469        | <b>0.024</b> | <b>0.046</b> | <b>613,023</b> | 0.331        | <b>0.113</b> | <b>0.169</b> |
| BWA-mem_FreeBayes       | 91,479     | 0.490        | 0.019        | 0.036        | 477,976        | 0.319        | 0.090        | 0.141        |
| BWA-mem_VarScan         | 98,567     | 0.486        | 0.020        | 0.038        | 530,111        | 0.347        | 0.099        | 0.154        |
| GSNAP_BCFtools          | 107,157    | 0.391        | 0.022        | 0.041        | 603,703        | 0.248        | 0.112        | 0.154        |
| GSNAP_FreeBayes         | 98,190     | <b>0.337</b> | 0.020        | 0.038        | 558,911        | <b>0.201</b> | 0.104        | 0.137        |
| GSNAP_VarScan           | 88,274     | 0.510        | 0.018        | 0.035        | 492,702        | 0.371        | 0.093        | 0.149        |
| Hisat2_BCFtools         | 69,191     | 0.575        | 0.014        | 0.028        | 378,768        | 0.427        | 0.073        | 0.125        |
| Hisat2_FreeBayes        | 77,726     | 0.437        | 0.016        | 0.031        | 431,219        | 0.271        | 0.082        | 0.126        |
| Hisat2_VarScan          | 62,516     | 0.634        | 0.013        | 0.025        | 344,120        | 0.507        | 0.067        | 0.118        |
| NovoAlign_BCFtools      | 96,848     | 0.459        | 0.020        | 0.038        | 529,660        | 0.327        | 0.099        | 0.152        |
| NovoAlign_FreeBayes     | 83,969     | 0.460        | 0.017        | 0.033        | 456,459        | 0.305        | 0.087        | 0.135        |
| NovoAlign_VarScan       | 81,855     | 0.535        | 0.017        | 0.032        | 458,081        | 0.411        | 0.087        | 0.144        |
| STAR_BCFtools           | 101,310    | 0.588        | 0.021        | 0.040        | 545,305        | 0.439        | 0.102        | 0.165        |
| STAR_FreeBayes          | 93,115     | 0.418        | 0.019        | 0.036        | 508,848        | 0.253        | 0.096        | 0.139        |
| STAR_VarScan            | 98,747     | 0.511        | 0.020        | 0.039        | 535,122        | 0.373        | 0.100        | 0.158        |
